# Supplementary material for: Extracellular Ca2+ is a danger signal activating the NLRP3 inflammasome through G protein-coupled calcium sensing receptors
Source: PubMed Central journal article supplement — Nat Commun. 2012 Dec 27;3:1329–. doi: 10.1038/ncomms2339 (PMC3535422; doi:10.1038/ncomms2339), 2012-12-27
Supplement: ncomms2339-s1.pdf [file ncomms2339-s1.pdf]

## Supplementary information

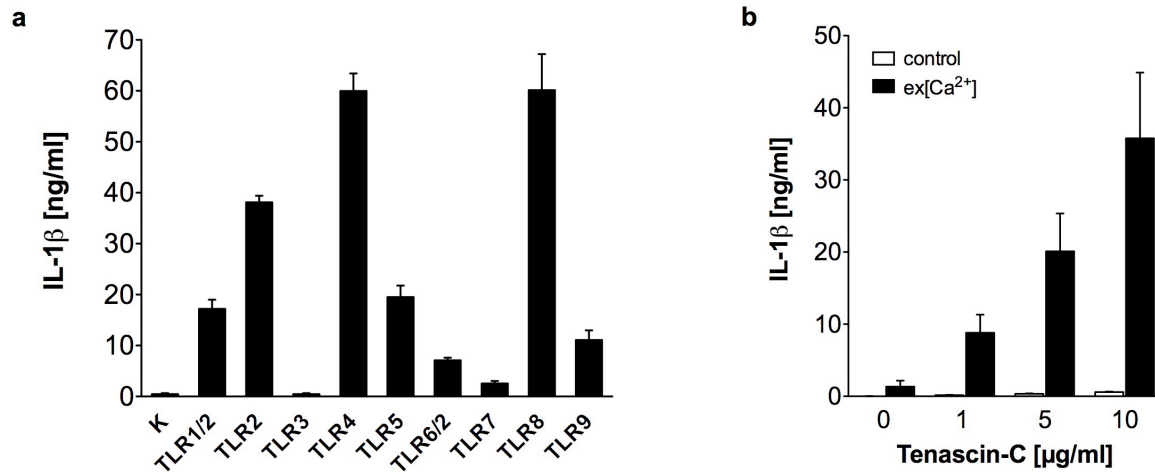

### Supplementary Figure S1: Ex[Ca<sup>2+</sup>]-induced IL-1 $\beta$ production of monocytes primed with different TLR ligands

IL-1 $\beta$  release of CD14<sup>+</sup> monocytes in response to stimulation for 16 hours with increased ex[Ca<sup>2+</sup>] (1.7 mM) plus the TLR stimulus indicated. (a) The following TLR ligands were used: Pam3CSK4 (TLR 1/2), heat-killed preparation of *Listeria monocytogenes* (TLR 2), Poly(I:C) (TLR 3), LPS (TLR 4), flagellin (TLR 5), FSL1 (TLR 6/2), Imiquimod (TLR 7), ssRNA40 (TLR 8) and ODN2006 (TLR 9). (b) The endogenous TLR4 ligand Tenascin-C was added in increasing concentrations (n=3). In all experiments, cytokine concentrations were determined in the supernatant by ELISA. All data are expressed as means $\pm$ SEM.

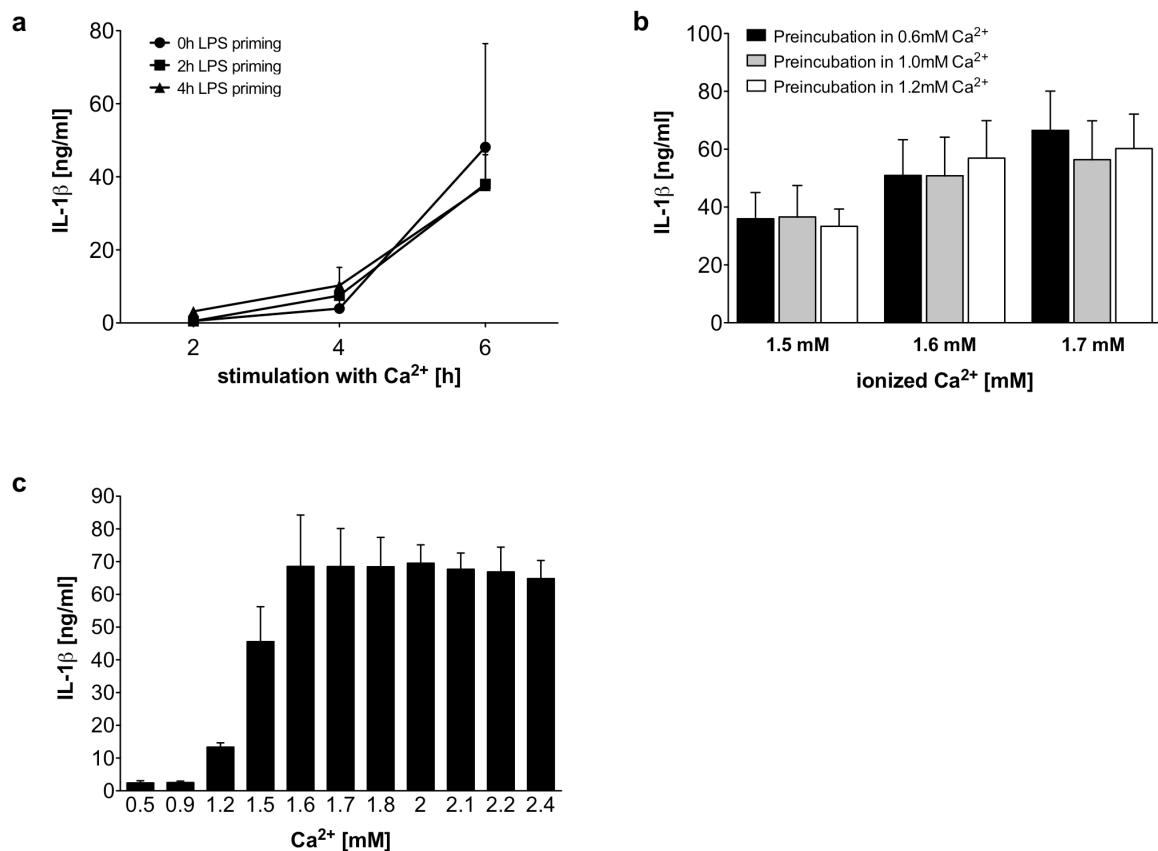

**Supplementary Figure S2: Influence of duration of LPS priming, initial extracellular Ca<sup>2+</sup> concentration and increasing Ca<sup>2+</sup> concentration during the culture on IL-1β release from monocytes**

(a) IL-1β release of CD14<sup>+</sup> monocytes in response to stimulation for 2 to 6 hours with increased extracellular calcium concentrations (1.7 mM) for 2 to 6 hours either without LPS priming (full circles) or with LPS priming for 2 or 4h (full squares or full triangles, respectively, n=3). (b) IL-1β release of CD14<sup>+</sup> monocytes in response to stimulation for 16 hours with increased extracellular calcium concentrations (1.5 to 1.7 mM) plus LPS (n=3). Monocytes were preincubated in varying ex[Ca<sup>2+</sup>] concentrations. (c) IL-1β release of CD14<sup>+</sup> monocytes in response to increasing ex[Ca<sup>2+</sup>] plus LPS after 16 h of stimulation (n=3). In all experiments, cytokine concentrations were determined in the supernatant by ELISA. All data are expressed as means±SEM.

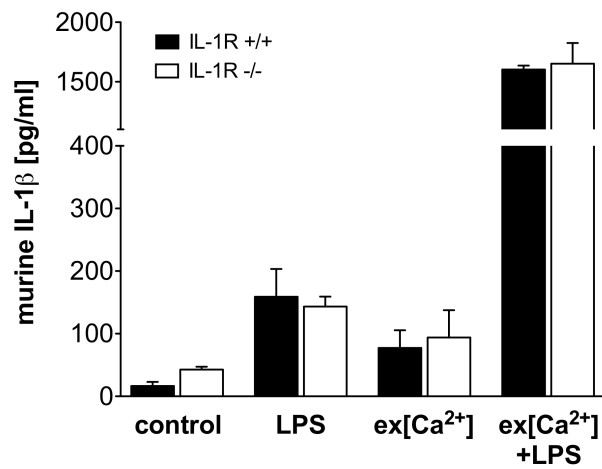

**Supplementary Figure S3: IL-1 $\beta$  secretion of monocytes stimulated with ex[Ca<sup>2+</sup>] plus LPS is independent from the presence of IL-1 receptor.**

IL-1 $\beta$  release of CD11b<sup>+</sup> peripheral blood monocytes from wildtype mice and IL-1R<sup>-/-</sup> mice in response to LPS and ex[Ca<sup>2+</sup>] plus LPS (n=4). All data are expressed as means $\pm$ SEM.

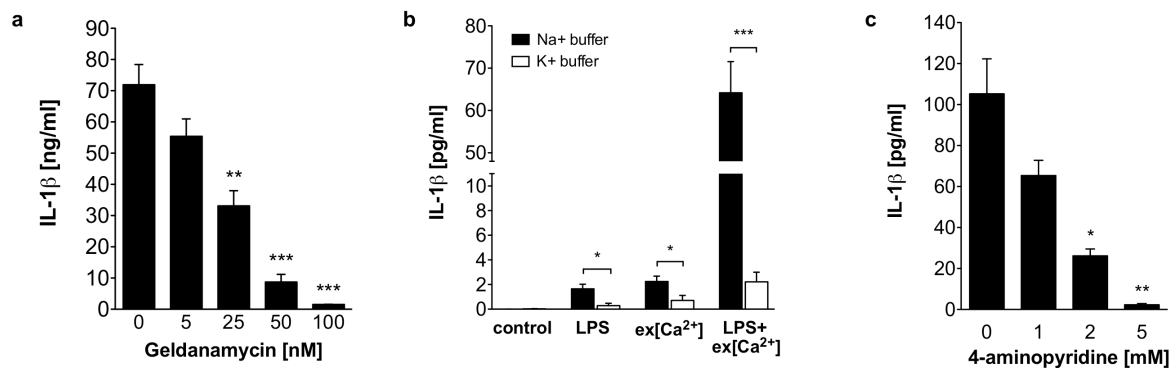

**Supplementary Figure S4: Ex[Ca<sup>2+</sup>]-induced release of IL-1 $\beta$  is inhibited by Geldanamycin, high extracellular potassium concentrations, and by the potassium channel blocker 4-aminopyridin, indicating K<sup>+</sup> efflux-dependent inflammasome activation**

(a) IL-1 $\beta$  release from monocytes in response to ex[Ca<sup>2+</sup>] (1.7mM) plus LPS in combination with increasing concentrations of the inflammasome inhibitor Geldanamycin (n=3) (b) IL-1 $\beta$  secretion of unstimulated monocytes (control), monocytes stimulated with LPS, with increased ex[Ca<sup>2+</sup>] concentration (1.7 mM), or both, in culture media containing high sodium concentrations as control (Na<sup>+</sup> buffer) or high extracellular potassium concentrations (K<sup>+</sup> buffer) (n=5). (c) IL-1 $\beta$  secretion of monocytes stimulated with ex[Ca<sup>2+</sup>] plus LPS in the absence or presence of the indicated concentrations of 4-aminopyridine (n=3). All data are expressed as means $\pm$ SEM (\*p<0.05, \*\*p<0.01, \*\*\*p<0.001).

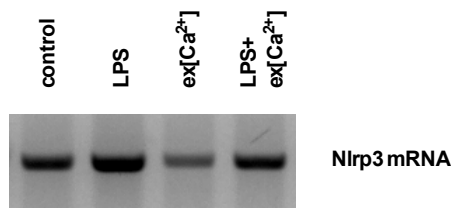

**Supplementary Figure S5: No influence of stimulation with ex[Ca<sup>2+</sup>] on Nlrp3 mRNA expression from LPS-primed monocytes**

Nlrp3 mRNA of human monocytes in response to LPS and ex[Ca<sup>2+</sup>] plus LPS. Shown is one representative experiment out of three.

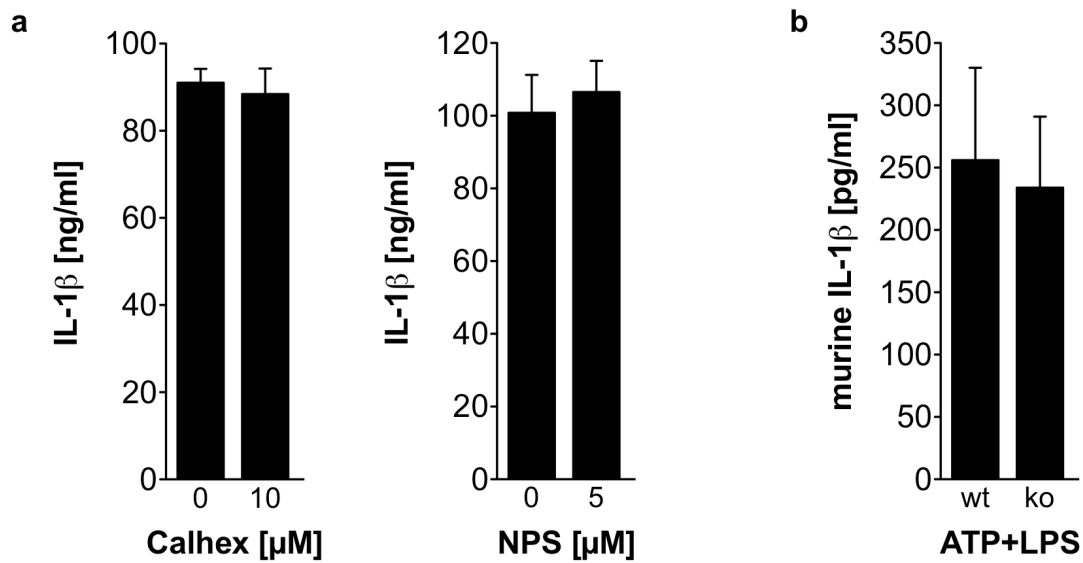

**Supplementary Figure S6: No influence of the CaSR/GPRC6A inhibitors Calhex 231 and NPS 2143 on ATP induced inflammasome activation**

(a) IL-1 $\beta$  release from LPS primed monocytes in response to ATP (5mM) in the absence or presence (at the indicated concentrations) of the CaSR/GPRC6A inhibitors Calhex 231 and NPS 2143 (n=3). (b) IL-1 $\beta$  release from LPS primed murine CD11b<sup>+</sup> bone-marrow cells from wildtype mice (wt) and GPRC6A<sup>-/-</sup> mice (ko) in response to ATP (5mM). All data are expressed as means $\pm$ SEM.

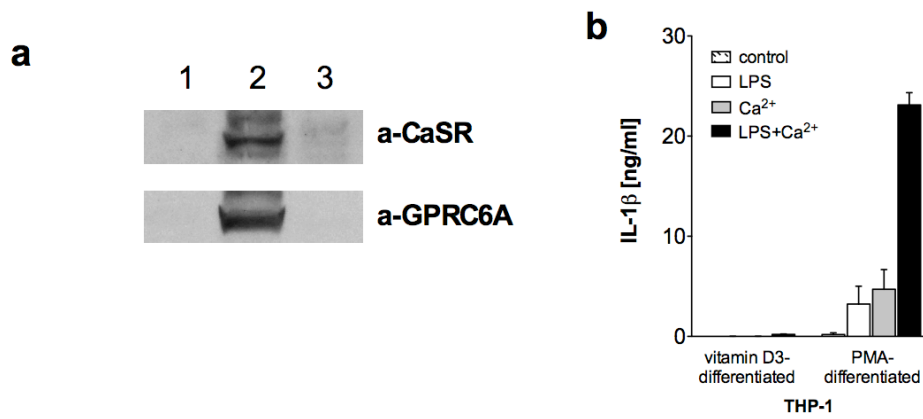

**Supplementary Figure S7: THP1 cells differentiated in the presence of PMA express CaSR and GPRC6A and respond to increased ex[Ca<sup>2+</sup>] with IL-1 $\beta$  secretion.**

(a) Western blot of protein expression of CaSR and GPRC6A in THP1 cells. Lanes were loaded with lysate from undifferentiated (lane 1), PMA differentiated (lane 2) or vitamin D3-differentiated (lane 3) THP1 cells. Shown is one representative experiment out of 3. (b) IL-1 $\beta$  release of THP1 cells in response to stimulation for 16 hours with ex[Ca<sup>2+</sup>], with LPS or both (n=3, Mean $\pm$ SEM).

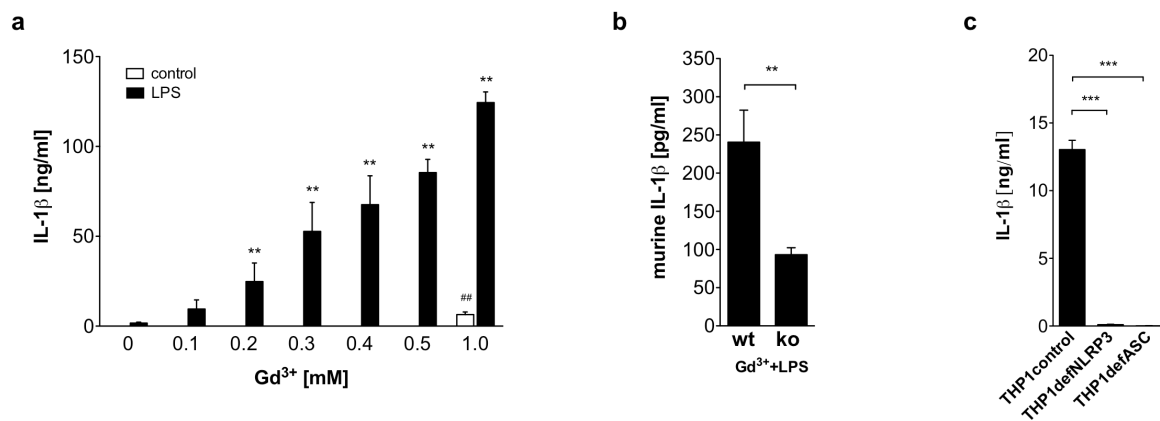

**Supplementary Figure S8: The alternative CaSR/GPRC6A ligand Gd<sup>3+</sup> induces IL-1 $\beta$  production via the Nlrp3 inflammasome.**

(a) IL-1 $\beta$  secretion of CD14<sup>+</sup> monocytes in response to increasing concentration of Gadolinium<sup>3+</sup> (control) compared to Gadolinium<sup>3+</sup> plus LPS. Experiments were performed in triplicates. (b) Gd<sup>3+</sup>-induced IL-1 $\beta$  secretion of CD11b<sup>+</sup> mononuclear cells isolated from bone marrow from GPRC6A<sup>+/+</sup> (wt) and GPRC6A<sup>-/-</sup> (ko) mice (n=5). (c) Gd<sup>3+</sup>-induced IL-1 $\beta$  secretion of PMA-differentiated control THP-1 cells (THP1 control), Nlrp3-deficient THP-1 cells (THP1defNLRP3) and ASC-deficient THP-1 cells (THP1defASC, n=3). All data are expressed as means $\pm$ SEM (\*p<0.05, \*\*p<0.01, \*\*\*p<0.001).



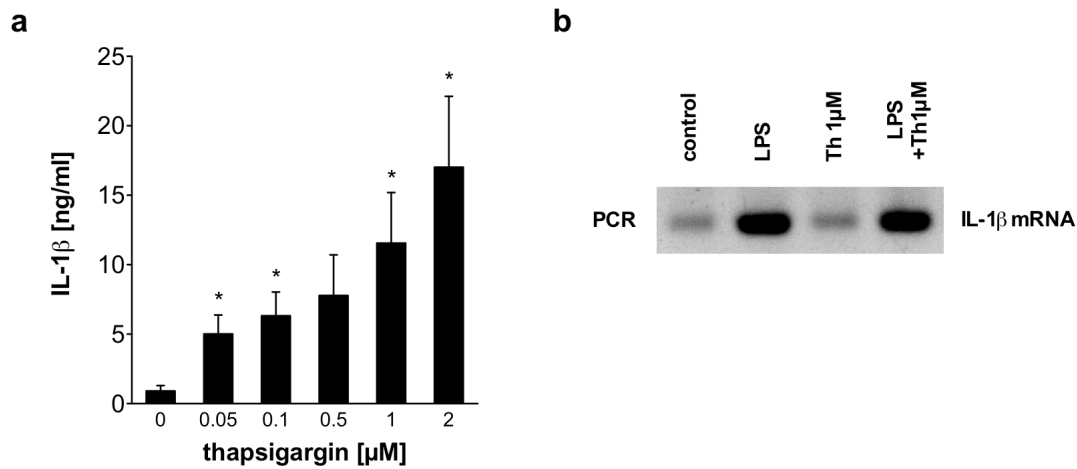

**Supplementary Figure S9: Elevation of  $\text{Ca}_i$  by incubation with Thapsigargin triggers IL-1 $\beta$  release in LPS primed monocytes**

(a) IL-1 $\beta$  release from monocytes in response to LPS in combination with increasing concentrations of thapsigargin (n=3). All data are expressed as means $\pm$ SEM (\*p<0.05). (B) IL-1 $\beta$  mRNA expression in human monocytes was analyzed by semi-quantitative PCR in response to LPS with or without thapsigargin (Th). Shown is one representative experiment out of three.

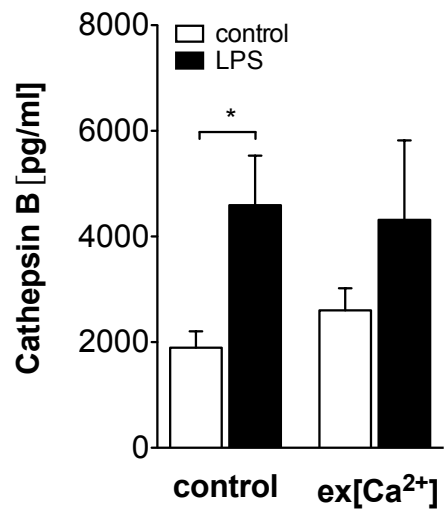

**Supplementary Figure S10: No influence of stimulation with ex[Ca<sup>2+</sup>] on secretion of Cathepsin B from LPS-primed monocytes**

Cathepsin B in the supernatant of human monocytes in response to LPS and ex[Ca<sup>2+</sup>] plus LPS (n=5). All data are expressed as means±SEM (\*p<0.05).

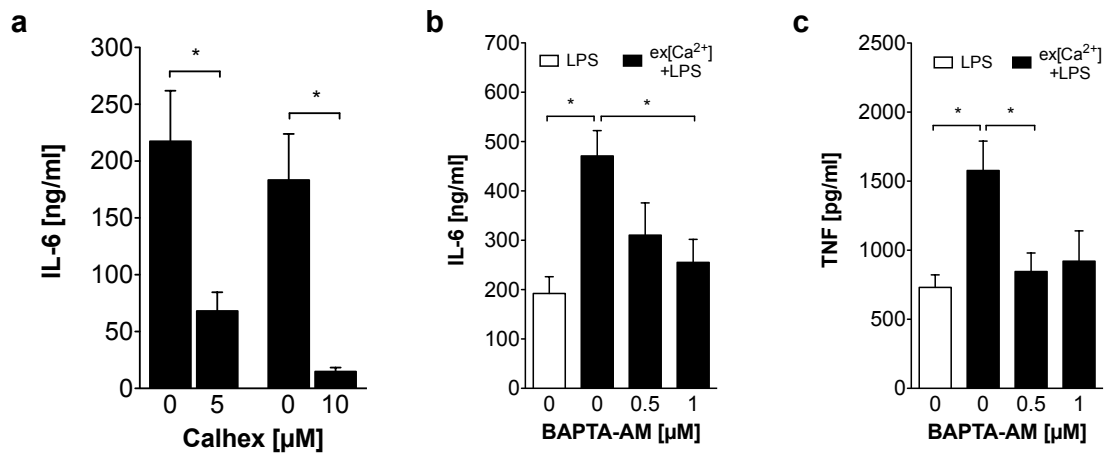

**Supplementary Figure S11: Secretion of IL-6 and TNF is dependent on CaSR and GPRC6A signalling and intracellular calcium accumulation**

(a) Influence of the specific inhibitor Calhex231 on the IL-6 secretion of monocytes stimulated with increased ex[Ca<sup>2+</sup>] (1.7 mM) plus LPS (n=3). (b,c) Secretion of IL-6 (b) and TNF (c) from LPS-stimulated monocytes (clear bars) or from monocytes stimulated with ex[Ca<sup>2+</sup>] (1.7 mM) plus LPS in the presence of the indicated concentrations of the cell-permeable Ca<sup>2+</sup>-chelator BAPTA-AM (n=3). All data are expressed as means $\pm$ SEM (\*p<0.05).

Supplementary Table S1: Titration of  $\text{Ca}^{2+}$  concentrations in the culture media

| <b>Added <math>\text{CaCl}_2</math></b> | <b>Measured ionized <math>\text{Ca}^{2+}</math></b> |
|-----------------------------------------|-----------------------------------------------------|
| 0                                       | 0.6 mM                                              |
| 0.5 mM                                  | 0.9 mM                                              |
| 1.0 mM                                  | 1.2 mM                                              |
| 1.5 mM                                  | 1.5 mM                                              |
| 2.0 mM                                  | 1.6 mM                                              |
| 2.5 mM                                  | 1.7 mM                                              |
| 3.0 mM                                  | 1.8 mM                                              |
